# Supplementary material
Source: publisher site journal article supplement (https://www.dovepress.com/get_supplementary_file.php?f=459784.docx)
Supplement: Supplementary file 1 [file get_supplementary_file.php]

**Supplemental Table 1 Swedish ICD codes**

|  | **ICD-10 (1997- )** | **ICD-9a (1987-1996)** |
| --- | --- | --- |
| **Cardiovascular** |  |  |
| Atrial fibrillation | I48 | 427D |
| Cerebrovascular disease | I60-69 | 430–34, 436–38 |
| Chronic heart failure | I50 | 428 |
| Ischemic heart disease | I20-22, I24-25 | 410-14 |
| Peripheral arterial disease | I70-73 | 440-43 |
| **Endocrine** |  |  |
| Diabetes | E10-14 | 250 |
| Osteoporosis | M80-82 | 733A-B |
| **Gastrointestinal** |  |  |
| Crohn’s disease | K50 | 555 |
| Ulcerative colitis | K51 | 556 |
| Liver diseases | K70-77 | 570-73 |
| Malabsorptive disorders | K90 | 579 |
| **Psychiatric** |  |  |
| Bipolar disorder | F30-31 | 296A, 296C, 296D, 296E, 296W, 296X |
| Depression | F32-33, F412 | 296B, 298A, 300E, 311 |
| Psychosis | F20-29 | 295, 297, 298B-E, 298W, 298X |
| **Neurological** |  |  |
| Dementia | F00-03, G30, G310, G311, G318A | 290, 294B, 331A-C |
| Epilepsy | G40-41 | 345 |
| Parkinson’s disease | G20 | 332A |
| **Respiratory** |  |  |
| Asthma | J45-46 | 493 |
| **Others** |  |  |
| Chronic kidney disease | N18-19 | 585-586 |
| Psoriasis | L40-41 | 696 |
| Rheumatic disease | M05-06, M32-35 | 710, 714 |
|  | | |
| **Cancers** | **ICD-7b** | |
| Bladder | 1810, 1816 | |
| Brain | 1921, 193 | |
| Breast | 170 | |
| Cervical | 171 | |
| Colorectal | 153-54 | |
| Endometrial | 172, 174 | |
| Kidney | 180 | |
| Leukaemia | 2003, 203–9, 2024 | |
| Liver | 1550, 156 | |
| Lung | 162-63 | |
| Lymphoma | 2001, 2002, 201, 2021, 2022 | |
| Melanoma | 190 | |
| Oesophagus | 150 | |
| Oral | 140-48, 161 | |
| Ovarian | 1750 | |
| Pancreas | 157, 1955 | |
| Prostate | 177 | |
| Stomach | 151 | |
|  |  | |
| **Cause of death** | **ICD-10** | |
| Cancer | C | |
| Cardiovascular | I | |
| Respiratory | J | |
| a Swedish ICD-9 codes use alphanumerical values instead of a decimal point followed by numerical values: A=0; B=1; C=2; D=3; E=4; F=5; G=6; H=7; W=8; X=9  b The National Cancer Register is coded in ICD-7 throughout the follow-up. | | |

**Supplemental Table 2 Characteristics of the study population**

| **Nested case-control study** | **COPD** | **Non-COPD** | **Total** |
| --- | --- | --- | --- |
| Number of individuals, n | 223 945 | 1 062 731 | 1 286 676 |
| Sex, n (%) |  |  |  |
| Female | 112 529 (50.3) | 533 124 (50.2) | 645 653 (50.2) |
| Male | 111 416 (49.8) | 529 607 (49.8) | 641 023 (49.8) |
| Median age at matching, years (IQR) | 76 (70-81) | 76 (70-81) | 76 (70-81) |
| Education level in 1997, n (%) |  |  |  |
| Not completed compulsory education (< 9 years) | 108 465 (48.4) | 443 121 (41.7) | 551 586 (42.9) |
| Completed compulsory education (9 years) | 15 758 (7.0) | 69 123 (6.5) | 84 881 (6.6) |
| Upper secondary education (2 years) | 58 877 (26.3) | 261 729 (24.6) | 320 606 (24.9) |
| Upper secondary education (3 years) | 17 729 (7.9) | 102 330 (9.6) | 120 059 (9.3) |
| Post-secondary education < 3 years | 11 161 (5.0) | 75 318 (7.1) | 86 479 (6.7) |
| Post-secondary education ≥ 3 years | 11 263 (5.0) | 102 554 (9.7) | 113 817 (8.9) |
| Postgraduate education | 692 (0.3) | 8 556 (0.8) | 9 248 (0.7) |
|  |  |  |  |
| **Cohort study** | **COPD** | **Non-COPD** | **Total** |
| Number of individuals, n (%) | 225 159 (8.3) | 2 481 655 (91.7) | 2 706 814 |
| Sex, n (%) |  |  |  |
| Female | 112 830 (50.1) | 1 326 877 (53.5) | 1 439 707 (53.2) |
| Male | 112 329 (49.9) | 1 154 778 (46.5) | 1 267 107 (46.8) |
| Median age in 1997, years (IQR) | 64 (57-71) | 64 (56-73) | 64 (56-73) |
| Education level in 1997, n (%) |  |  |  |
| Not completed compulsory education (< 9 years) | 109 054 (48.4) | 1 096 992 (44.2) | 1 206 046 (44.6) |
| Completed compulsory education (9 years) | 15 835 (7.0) | 164 823 (6.6) | 180 658 (6.7) |
| Upper secondary education (2 years) | 59 111 (26.3) | 601 713 (24.3) | 660 824 (24.4) |
| Upper secondary education (3 years) | 17 879 (7.9) | 218 935 (8.8) | 236 814 (8.8) |
| Post-secondary education < 3 years | 11 230 (5.0) | 164 319 (6.6) | 175 549 (6.5) |
| Post-secondary education ≥ 3 years | 11 345 (5.0) | 218 046 (8.8) | 229 391 (8.5) |
| Postgraduate education | 705 (0.3) | 16 827 (0.7) | 17 532 (0.7) |
| Abbreviations: IQR, interquartile range | | | |
